# Supplementary material for: A Polyphasic Characterisation of Tetradesmus almeriensis sp. nov. (Chlorophyta: Scenedesmaceae)
Source: MDPI journal article supplement (doi:10.3390/pr9112006), 2021-11-10
Supplement: s1 [file s1]

**Supplementary Table S1.** ITS sequences extracted from GenBank, NCBI, and used in this study.

| Species                               | Accession number | Length | Reference              |
|---------------------------------------|------------------|--------|------------------------|
| <i>Asterarcys quadricellulare</i>     | JQ043184         | 1530   |                        |
| <i>Chlorella vulgaris</i>             | VJNP01000984.1   | 8919   |                        |
| <i>Comasiella arcuata</i>             | AJ400491         | 257    | (Hegewald et al. 2013) |
| <i>Desmodesmus costato-granulatus</i> | DQ417574         | 639    | (Fawley et al. 2011)   |
| <i>Desmodesmus cuneatus</i>           | DQ417566         | 631    | (Johnson et al. 2007)  |
| <i>Desmodesmus elegans</i>            | AM228906         | 363    | (Keller et al. 2008)   |
| <i>Desmodesmus hystrix</i>            | DQ417551         | 662    | (Johnson et al. 2007)  |
| <i>Desmodesmus itascaensis</i>        | DQ417540         | 650    | (Fawley et al. 2011)   |
| <i>Desmodesmus perdix</i>             | DQ417573         | 627    | (Fawley et al. 2011)   |
| <i>Desmodesmus santosii</i>           | DQ417524         | 607    | (Fawley et al. 2011)   |
| <i>Desmodesmus serratus</i>           | GU192380         | 556    | (Fawley et al. 2011)   |
| <i>Desmodesmus spinosus</i>           | KT778092         | 1179   | (Zou et al. 2016)      |
| <i>Enallax acutiformis</i>            | HG514427         | 689    | (Hegewald et al. 2013) |
| <i>Flechtneria rotunda</i>            | HQ246446         | 669    | (Sciuto et al. 2015)   |
| <i>Scenedesmus bijugus</i>            | KT778082         | 1195   | (Zou et al. 2016)      |
| <i>Scenedesmus ecornis</i>            | HG514419         | 323    | (Sciuto et al. 2015)   |
| <i>Scenedesmus ellipticus</i>         | HG514420         | 606    | (Sciuto et al. 2015)   |
| <i>Scenedesmus hindakii</i>           | AY170856         | 248    | (Hegewald et al. 2013) |
| <i>Scenedesmus obtusus</i>            | HG514425         | 599    | (Terlova & Lewis 2019) |
| <i>Scenedesmus quadricauda</i>        | KT778086         | 1192   | (Zou et al. 2016)      |
| <i>Scenedesmus vacuolatus</i>         | KJ676126         | 1361   |                        |
| <i>Tetradesmus adustus</i>            | MK291430         | 285    | (Terlova & Lewi        |

|                                    |          |      |                        |
|------------------------------------|----------|------|------------------------|
|                                    |          |      | s<br>2019<br>)         |
| <i>Tetrademus bajacalifornicus</i> | HQ246450 | 701  | (Sciuto et al. 2015)   |
| <i>Tetrademus deserticola</i>      | AY510474 | 673  | (Hegewald et al. 2013) |
| <i>Tetrademus dimorphus</i>        | KT778101 | 1241 | (Zou et al. 2016)      |
| <i>Tetrademus obliquus</i>         | JQ082324 | 877  | (Hegewald et al. 2013) |
| <i>Tetrademus wisconsinensis</i>   | HG514430 | 602  | (Sciuto et al. 2015)   |

**Supplementary Table S2.** *rbcl* sequences extracted from GenBank, NCBI, and used in this study.

| Species                               | Accession number | Length | Reference            |
|---------------------------------------|------------------|--------|----------------------|
| <i>Asterarcys quadricellulare</i>     | MK995333         | 111776 |                      |
| <i>Chlorella vulgaris</i>             | VJNP01000153.1   | 69788  |                      |
| <i>Comasiella arcuata</i>             | HG514379         | 720    | (Sciuto et al. 2015) |
| <i>Desmodesmus costato-granulatus</i> | GU192427         | 999    | (Fawley et al. 2011) |
| <i>Desmodesmus cuneatus</i>           | GU192435         | 1081   |                      |
| <i>Desmodesmus elegans</i>            | GU192426         | 999    | (Fawley et al. 2011) |
| <i>Desmodesmus hystrix</i>            | GU192433         | 1068   |                      |
| <i>Desmodesmus itascaensis</i>        | GU192424         | 906    | (Fawley et al. 2011) |
| <i>Desmodesmus perdix</i>             | GU192415         | 872    | (Fawley et al. 2011) |
| <i>Desmodesmus santosii</i>           | GU192418         | 1083   | (Fawley et al. 2011) |
| <i>Desmodesmus serratus</i>           | GU192409         | 910    | (Fawley et al. 2011) |

|                                     |                |        |                        |
|-------------------------------------|----------------|--------|------------------------|
| <i>Desmodesmus spinosus</i>         | KT777977       | 1161   | (Terlova & Lewis 2019) |
| <i>Enallax acutiformis</i>          | HG514382       | 760    |                        |
| <i>Flechtenia rotunda</i>           | HQ246351       | 2261   | (Sciuto et al. 2015)   |
| <i>Scenedesmus bijugus</i>          | KT777978       | 1161   | (Terlova & Lewis 2019) |
| <i>Scenedesmus ecornis</i>          | KT003373       | 576    | (Vieira et al. 2016)   |
| <i>Scenedesmus ellipticus</i>       | HG514370       | 658    | (Sciuto et al. 2015)   |
| <i>Scenedesmus hindakii</i>         | HG514369       | 737    | (Terlova & Lewis 2019) |
| <i>Scenedesmus obtusus</i>          | HG514376       | 721    | (Sciuto et al. 2015)   |
| <i>Scenedesmus quadricauda</i>      | KT777979       | 1161   |                        |
| <i>Scenedesmus vacuolatus</i>       | RHEI01007419   | 1348   |                        |
| <i>Tetradismus adustus</i>          | MK291431       | 550    | (Terlova & Lewis 2019) |
| <i>Tetradismus bajacalifornicus</i> | HQ246354       | 1305   | (Sciuto et al. 2015)   |
| <i>Tetradismus deserticola</i>      | KT777950       | 1161   | (Terlova & Lewis 2019) |
| <i>Tetradismus dimorphus</i>        | KT777984       | 1161   | (Terlova & Lewis 2019) |
| <i>Tetradismus obliquus</i>         | NEDT01000001.1 | 161452 |                        |
| <i>Tetradismus wisconsinensis</i>   | HG514384       | 740    | (Sciuto et al. 2015)   |

## References

- Fawley M. W., Fawley K. P., & Hegewald E. (2011): Taxonomy of *Desmodesmus serratus* (Chlorophyceae, Chlorophyta) and related taxa on the basis of morphological and DNA sequence data. – *Phycologia*.
- Hegewald E., Bock C., & Krienitz L. (2013): A phylogenetic study on Scenedesmaceae with the description of a new species of *Pectinodesmus* and the new genera *Verrucodesmus* and *Chodatodesmus* (Chlorophyta, Chlorophyceae). – *Fottea*.
- Johnson J. L., Fawley M. W., & Fawley K. P. (2007): The diversity of *Scenedesmus* and *Desmodesmus* (Chlorophyceae) in Itasca State Park, Minnesota, USA. – *Phycologia*.

- Keller A., Schleicher T., Förster F., Ruderisch B., Dandekar T., Müller T., & Wolf M. (2008): ITS2 data corroborate a monophyletic chlorophycean DO-group (Sphaeropleales). – BMC Evol. Biol.
- Sciuto K., Lewis L. A., Verleyen E., Moro I., & Rocca N. La. (2015): *Chodatodesmus australis* sp. nov. (Scenedesmaceae, Chlorophyta) from Antarctica, with the emended description of the genus *Chodatodesmus*, and circumscription of *Flechtneria rotunda* gen. et sp. nov. – J. Phycol.
- Terlova E. F. & Lewis L. A. (2019): A new species of *Tetradasmus* (Chlorophyceae, Chlorophyta) isolated from desert soil crust habitats in southwestern North America. – Plant Fungal Syst. 64: 25–32.
- Vieira H. H., Bagatini I. L., Guinart C. M., & Vieira A. A. H. (2016): *tufA* gene as molecular marker for freshwater Chlorophyceae. – Algae.
- Zou S., Fei C., Wang C., Gao Z., Bao Y., He M., & Wang C. (2016): How DNA barcoding can be more effective in microalgae identification: a case of cryptic diversity revelation in *Scenedesmus* (Chlorophyceae). – Sci. Rep.
